# Supplementary material for: Orthodontic Retention—Protocols and Materials—A Questionnaire Pilot Study among Polish Practitioners
Source: MDPI journal article supplement (doi:10.3390/ma15020666), 2022-01-16
Supplement: s1 [file s1]

1. Pański wiek \*

Zaznacz tylko jedną odpowiedź.

- a) <30
- b) 30-40
- c) 40-50
- d) >50

2. Jaki rodzaj retencji stosuje Pan/i u pacjentów po zakończeniu leczenia ortodontycznego? \*

Zaznacz tylko jedną odpowiedź.

- a) Tylko stałą
- b) Tylko wyjmowaną
- c) Stałą oraz wyjmowaną

3. Według mnie okres retencji po zdjęciu aparatu stałego powinien trwać: \*

Zaznacz wszystkie właściwe odpowiedzi.

- a) Połowę okresu leczenia aktywnego
- b) Tyle samo co leczenie aktywne
- c) 2 razy dłużej niż aktywne leczenie
- d) rok
- e) 2 lata
- f) 5 lat
- g) Dożywotnio
- h) Inne:

4. Częstość wizyt kontrolnych z aparatem retencyjnym w mojej praktyce to \*

Zaznacz wszystkie właściwe odpowiedzi.

- a) Co miesiąc
- b) Co 3 miesiące
- c) Co pół roku
- d) Raz w roku
- e) Pierwsza i druga wizyta co 3 miesiące, potem co pół roku
- f) Pierwsza wizyta po miesiącu, druga po 3 miesiącach, potem co pół roku
- g) Inne:

5. Jaką metodą klei Pan/i retainery? \*

Zaznacz wszystkie właściwe odpowiedzi.

- a) Pośrednio
- b) Bezpośrednio

6. Jak ocenia Pan/i wyniki stosowanego leczenia retencyjnego? \*

Zaznacz wszystkie właściwe odpowiedzi.

- a) Utrzymanie idealnych pozycji zębów jest trudne.
- b) Udaję mi się idealnie utrzymać wyniki fazy aktywnej leczenia u większości pacjentów
- c) Awarie aparatów retencyjnych stanowią poważny problem kliniczny.
- d) Awarie aparatów retencyjnych są meryginalnym problemem klinicznym.
- e) Pacjenci zwykle współpracują podczas fazy retencyjnej leczenia ortodontycznego.
- f) Pacjenci zwykle nie współpracują podczas fazy retencyjnej leczenia ortodontycznego.
- g) Inne:

7. Jaki rodzaj retencji stałej Pan/i stosuje?

Zaznacz wszystkie właściwe odpowiedzi.

- a) Włókno szklane (Fiber Reinforced Composite)
- b) Drut stalowy

- c) Drut tytanowy
- d) Nie stosuję retencji stałej
- e) Inne:

8. Jeżeli stosuje Pan/i włókno szklane, jakiego rodzaju jest to materiał?  
Zaznacz wszystkie właściwe odpowiedzi.

- a) Sznureczek
- b) Taśma

9. Jeżeli stosuje Pan/i drut, jakiego rodzaju to materiał? \*  
Zaznacz wszystkie właściwe odpowiedzi.

- a) Stalowy pojedynczy
- b) Stalowy pleciony okrągły
- c) Stalowy pleciony czworokątny
- d) Tytanowy
- e) Złoty łańcuszek
- f) Niklowo-tytanowy
- g) Inne:

10. Jeżeli stosuje Pan/i drut, jakie ma on wymiary?  
Zaznacz wszystkie właściwe odpowiedzi.

- a)  $0.014 \times 0.014$
- b) 0.015"
- c) 0.016
- d)  $0.016'' \times 0.022''$
- e) 0.0175'
- f) 0.0195
- g) 0.027"
- h) Nie wiem
- i) Inne:

11. Jaki materiał używa Pan/i do klejenia drutów retencyjnych? \*  
Zaznacz wszystkie właściwe odpowiedzi.

- a) Płynnego materiału kompozytowego dedykowanego do retencji
- b) Płynnego materiału kompozytowego do wypełnień
- c) Materiału kompozytowego przeznaczonego do wypełnień
- d) Kleju światłoutwardzalnego do zamków ortodontycznych
- e) Materiału światłoutwardzalnego przeznaczonego do klejenia pośredniego
- f) Materiału chemoutwardzalnego przeznaczonego do klejenia pośredniego
- g) Inne:

12. Pana/i zdaniem drut retencyjny okrągły \*  
Zaznacz wszystkie właściwe odpowiedzi.

- a) Jest łatwy do doginania
- b) Rzadko się odkleja
- c) Łatwo się zakłada
- d) Rzadko się deformuje
- e) Skutecznie zapobiega niepożądanym przesunięciom zębów
- f) Jest trudny do doginania
- g) Często się odkleja
- h) Trudno się zakłada
- i) Często się deformuje
- j) Nie zawsze skutecznie zapobiega niepożądanym przesunięciom zębów
- k) Nie mam zdania - nie stosuję

13. Pana/i zdaniem drut retencyjny czworokątny \*

Zaznacz wszystkie właściwe odpowiedzi.

- a) Jest łatwy do doginania
- b) Rzadko się odkleja
- c) Łatwo się zakłada
- d) Rzadko się deformuje
- e) Skutecznie zapobiega niepożądanym przesunięciom zębów
- f) Jest trudny do doginania
- g) Często się odkleja
- h) Trudno się zakłada
- i) Często się deformuje
- j) Nie zawsze skutecznie zapobiega niepożądanym przesunięciom zębów
- k) Nie mam zdania - nie stosuję

14. Pana/i zdaniem retencyjny złoty łańcuszek \*

Zaznacz wszystkie właściwe odpowiedzi.

- a) Jest łatwy do doginania
- b) Rzadko się odkleja
- c) Łatwo się zakłada
- d) Rzadko się deformuje
- e) Skutecznie zapobiega niepożądanym przesunięciom zębów
- f) Jest trudny do doginania
- g) Często się odkleja
- h) Trudno się zakłada
- i) Często się deformuje
- j) Nie zawsze skutecznie zapobiega niepożądanym przesunięciom zębów
- k) Nie mam zdania - nie stosuję

15. Włókno szklane do retencji \*

Zaznacz wszystkie właściwe odpowiedzi.

- a) Nie stosuję
- b) Stosuję u pacjentów z chorobą przyzębia po leczeniu ortodontycznym
- c) Stosuję u większości pacjentów po leczeniu ortodontycznym
- d) Stosuję u wszystkich pacjentów
- e) Inne:

16. Pana/i zdaniem włókno szklane:

Zaznacz wszystkie właściwe odpowiedzi.

- a) Jest estetyczne
- b) Jest trwałe
- c) Łatwo się zakłada
- d) Rzadko się deformuje
- e) Skutecznie zapobiega niepożądanym przesunięciom zębów
- f) Utrudnia higienę
- g) Często się odkleja
- h) Trudno się zakłada
- i) Często się deformuje
- j) Nie zawsze skutecznie zapobiega niepożądanym przesunięciom zębów
- k) Nie mam zdania - nie stosuję

17. Jaki materiał używa Pan/i do klejenia szyn z włókna szklanego? \*

Zaznacz wszystkie właściwe odpowiedzi.

- a) Płynnego materiału kompozytowego dedykowanego do retencji
- b) Płynnego materiału kompozytowego do wypełnień
- c) Materiału kompozytowego przeznaczonego do wypełnień

- d) Kleju światłoutwardzalnego do zamków ortodontycznych
- e) Materiału światłoutwardzalnego przeznaczonego do klejenia pośredniego
- f) Materiału chemoutwardzalnego przeznaczonego do klejenia pośredniego
- g) Inne:
